# Supplementary material for: Identification and Characterization of an Antifungal Gene Mt1 from Bacillus subtilis by Affecting Amino Acid Metabolism in Fusarium graminearum
Source: MDPI journal article supplement (doi:10.3390/ijms24108857), 2023-05-16
Supplement: s1 [file s1]

## Supplementary Materials

# Identification and Characterization of an Antifungal Gene *Mt1* from *Bacillus subtilis* by Affecting Amino Acid Metabolism in *Fusarium graminearum*

Pei Song and Wubei Dong

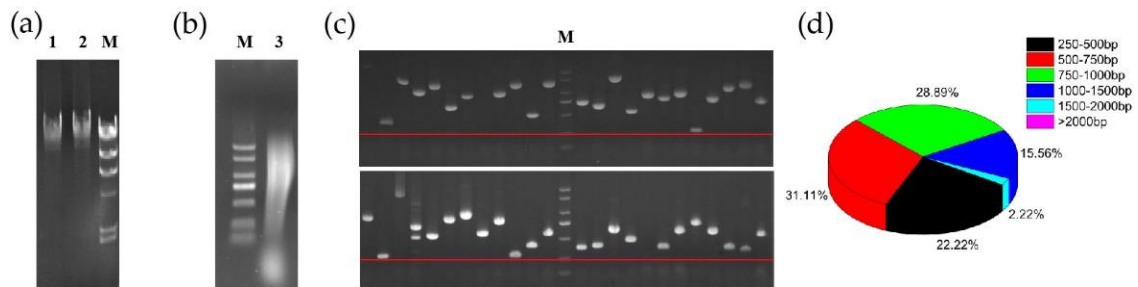

**Figure S1.** Construction of gene expression libraries. (a) Samples of 1 and 2 are both genomic DNA of *B. subtilis* 330-2, M =  $\lambda$ HindIII DNA Ladder Marker. (b) DNA fragment of *B. subtilis* 330-2 genomic DNA by sonication. (c) PCR amplification of recombinant gene, M = DL2000 Marker. (d) Distribution of each group of DNA fragments.

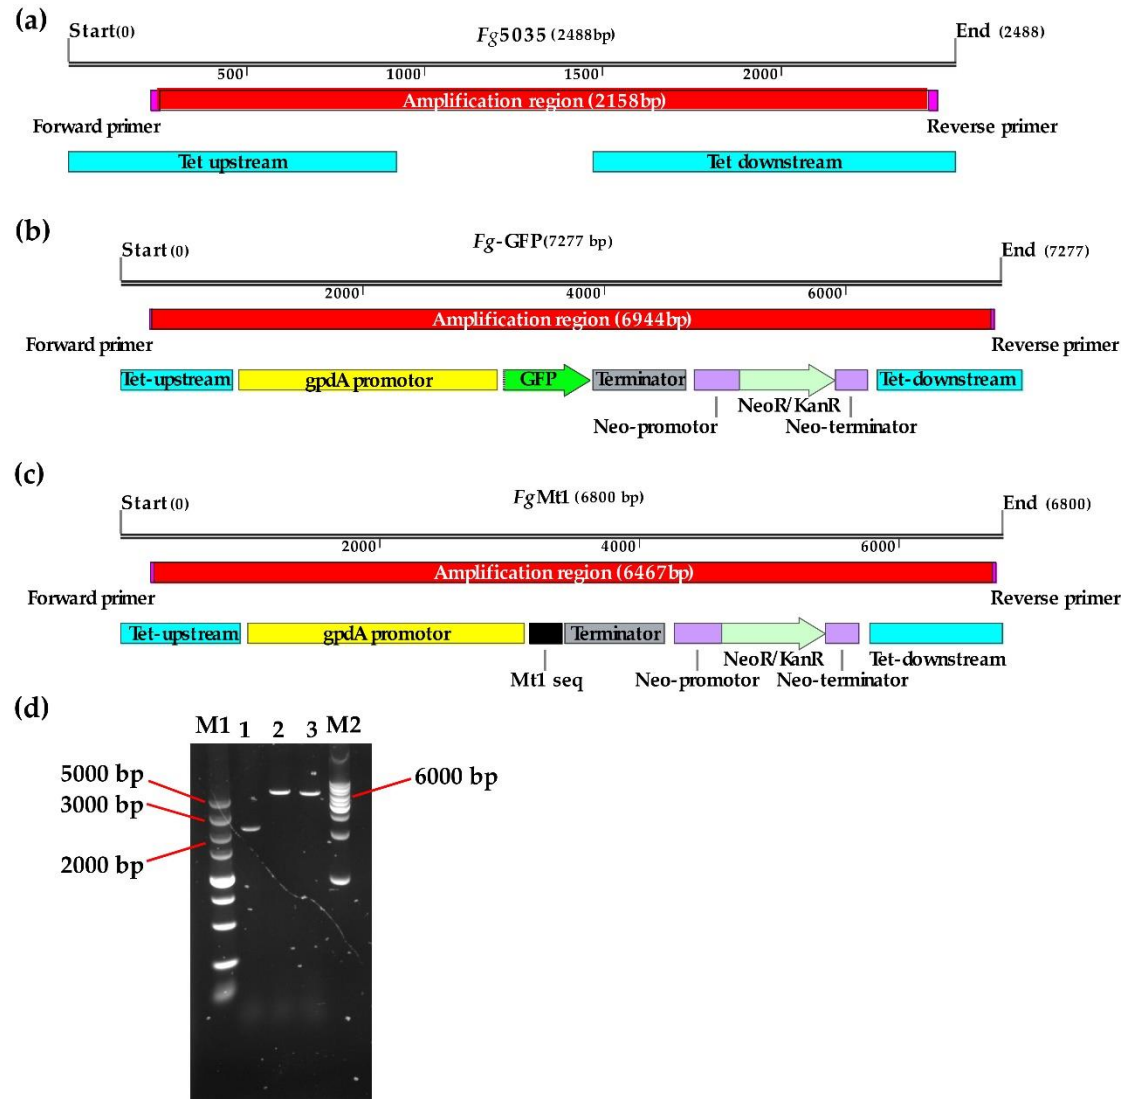

**Figure S2.** Detection of *pls* locus. (a) Schematic diagram of the genomic *pls* locus of strain Fg-5035. (b) Schematic diagram of the genomic *pls* locus of strain Fg-GFP. (c) Schematic diagram of the genomic *pls* locus of strain FgMt1. (d) Detection of *pls* locus insertion by pcr amplification. M1: GL 5000 DNA Ladder; M2: DM 1 kb plus DNA Ladder; 1: Detection of *pls* loci in Fg-5035; 2: Detection of *pls* loci in Fg-GFP; 3: Detection of *pls* loci in FgMt1. In addition, the forward primers used for amplification: cctgtacctaacgcaacactctacc; the reverse primers used for amplification: aagtcagccataaatcagtcgagaat. Reaction conditions for amplification: (1) 95°C for 3 min; (2) 95°C for 15 sec, 74°C for 10 min, 5 cycles in total. (3) 95°C for 15 sec, 72°C for 10 min, 5 cycles in total. (4) 95°C for 15 sec, 70°C for 10 min, 5 cycles in total. (5) 95°C for 15 sec, 68°C for 10 min, 5 cycles in total. (2) 68°C for 5 min.

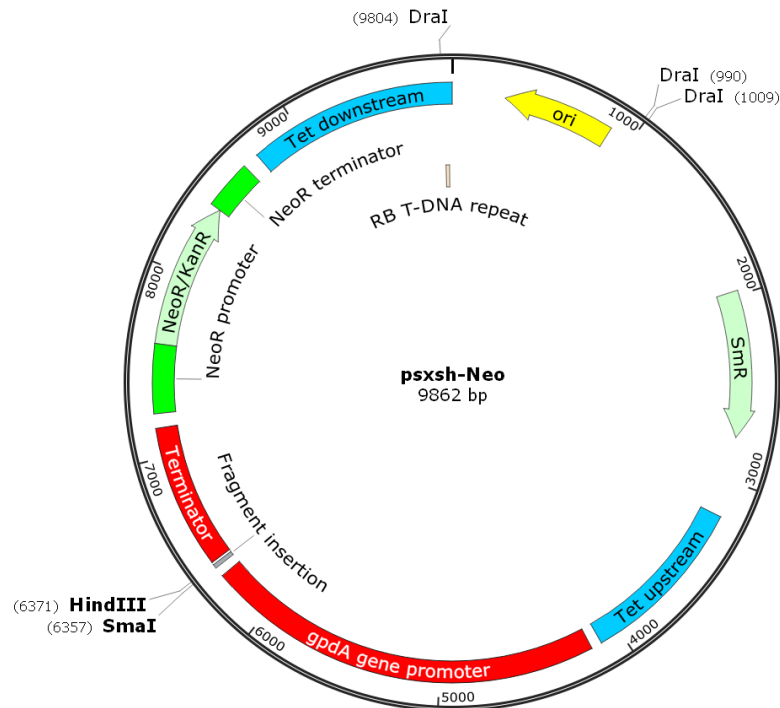

**Figure S3.** Vector map of psxsh-Neo. The *Dra* I restriction enzyme site serves for vector linearization, while the gene fragment insertion site is situated between *Hind*III and *Sma* I. Moreover, the vector includes a gene that confers resistance to neomycin, which is utilized for antibiotic screening.

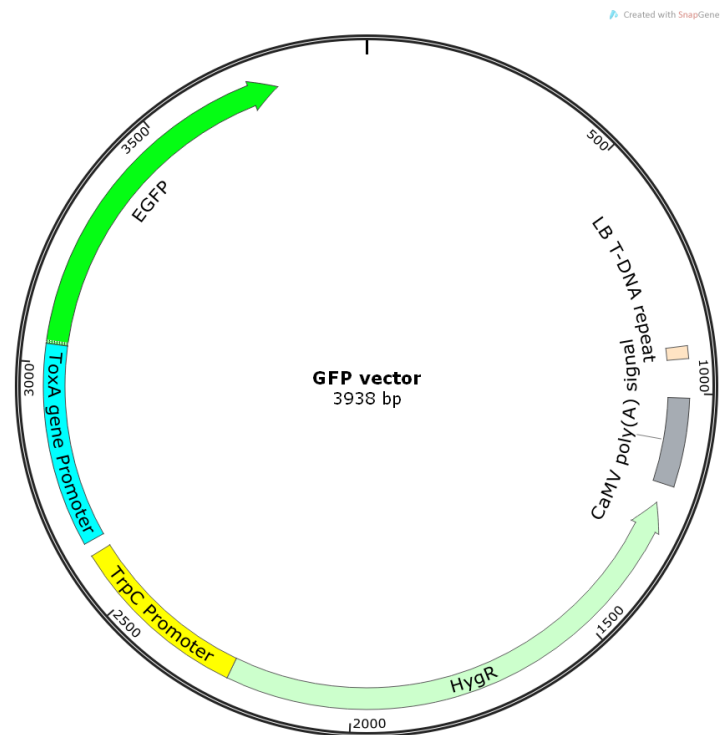

**Figure S4.** Vector map of psxsh-Neo. The *Dra* I restriction enzyme site serves for vector linearization, while the gene fragment insertion site is situated between *Hind*III and *Sma*

I . Moreover, the vector includes a gene that confers resistance to neomycin, which is utilized for antibiotic screening.

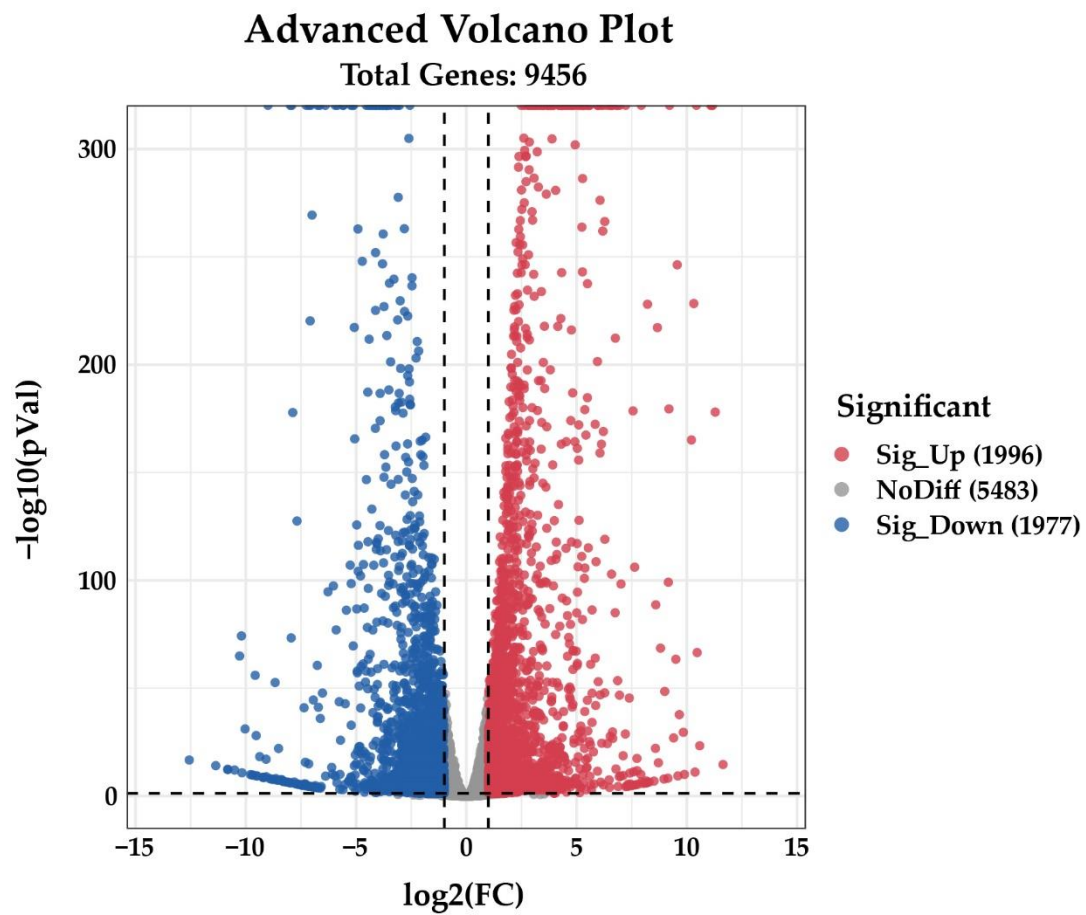

**Figure S5.** Advanced volcano plot showing gene expression in recombinants, with red dots indicating significantly up-regulated genes and blue dots indicating significantly down-regulated genes.

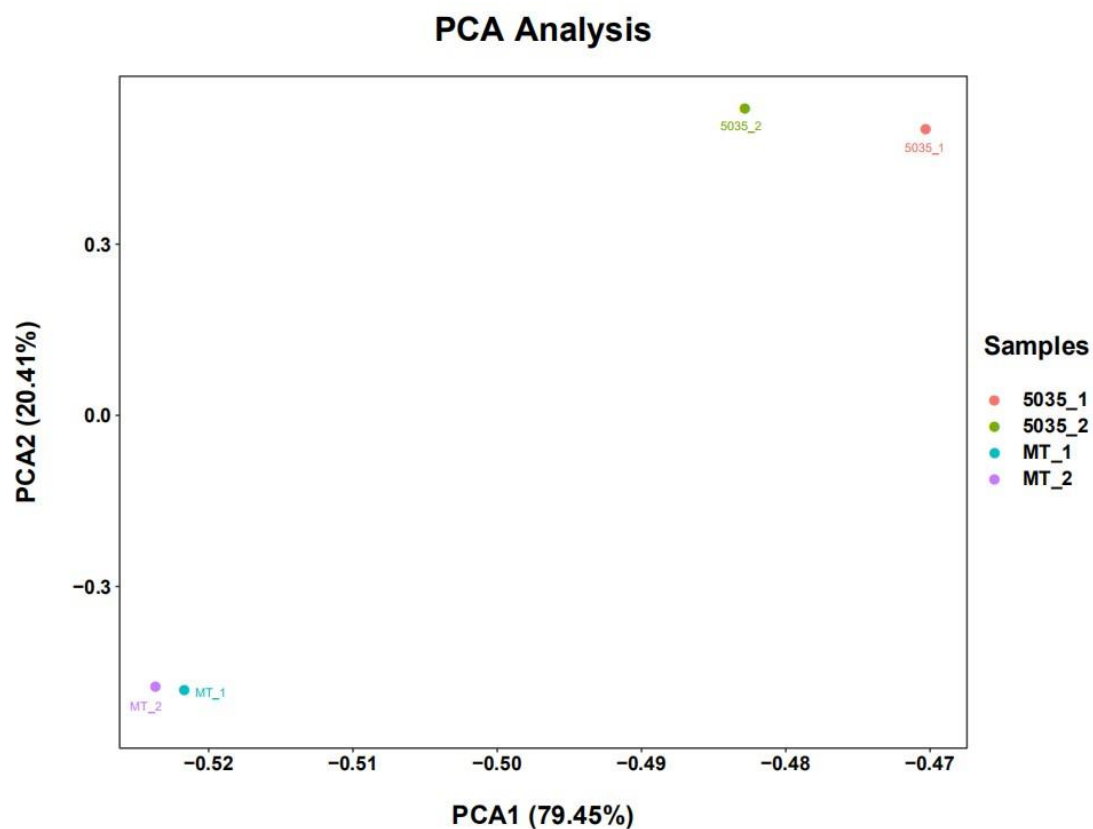

**Figure S6.** Principal component analysis of transcriptome data of *FgMt1* and *Fg5035* strains

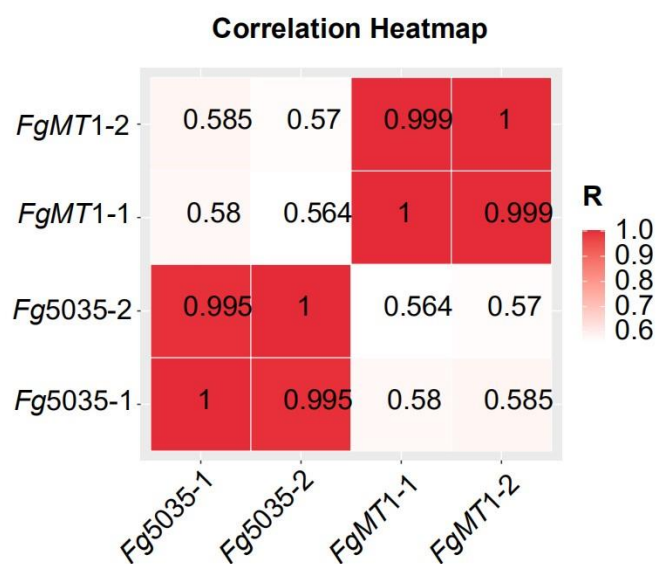

**Figure S7.** Correlation analysis of transcriptome data between *FgMt1* and *Fg5035* strain

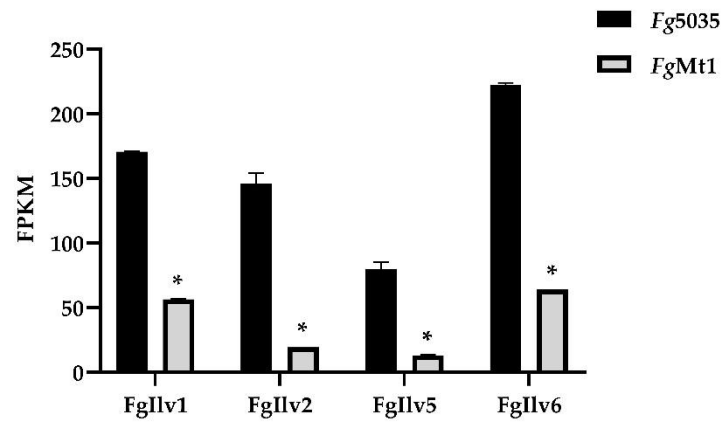

**Figure S8.** Transcript levels of the FgILV family genes. FgIlv1: FGSG\_00296; FgIlv2: FGSG\_01086; FgIlv5: FGSG\_10118; and FgIlv6: FGSG\_06282. T-test was used for the experimental analysis, "\*" indicates  $p < 0.05$  and "ns" indicates no significant difference.

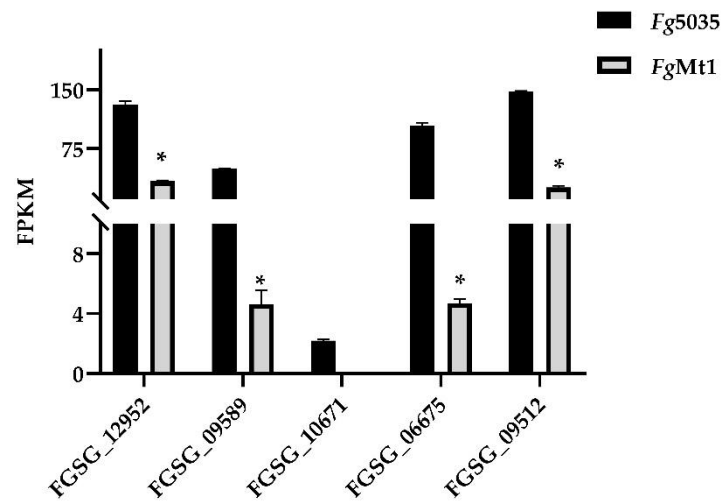

**Figure S9.** Transcript levels of genes related to the leucine synthesis pathway in *Fg*. T-test was used for these experimental analysis, "\*" indicates  $p < 0.05$  and "ns" indicates no significant difference.

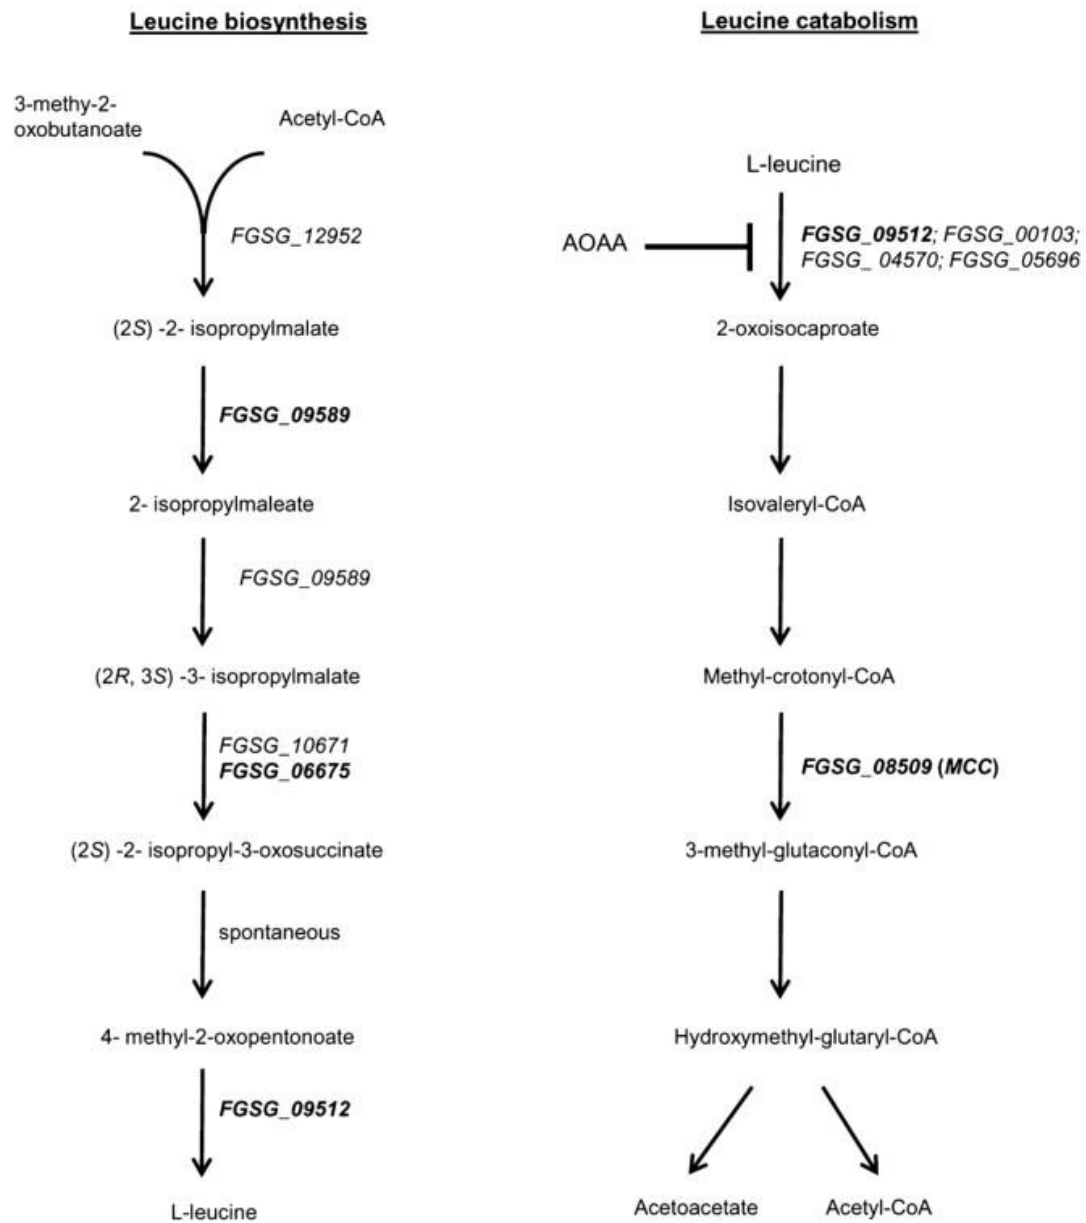

**Figure S10.** Leucine metabolic pathway in *Fg* [1].

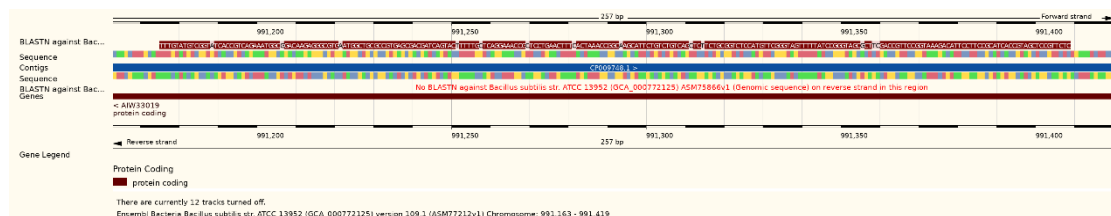

**Figure S11.** *Mt1* nucleotide sequence alignment results based on *Ensembl Bacteria* database.

***FgMt1* nucleotide sequence:**

5'-

ATGCCCTTTGTATGTCGGTATCACCGTCAGAAATGGCGGACAAGAGGGCGTGAAT  
GGCTGCGCCGTGAGCGACGATCAGTACTTTTTGCTCAGGAAACCGCTCCTGAACT  
TTCATAAACCAGCAAGCATTCTGTCTGTCAGCTCTTCTGCGGTCTCCATGTTCCG  
GTAGTTTTTATCCGGGTAGCGCTTCGACCGTTCCGGTAAAGACATTCCTTCCGCAT  
CACCGTAGCTCCGTTCTCTGA - 3'

***FgMt1* protein sequence:**

MPFVCRYHRQKWRTRGREWLRERRSVLFAQETAPESLNRQAFCLSALLRSPCSGSF  
YPGSASTVPVKTFLPHHRSSL

**Table S1.** Mt1 nucleotide alignment in NCBI

| Genomic Location           | Overlapping<br>Gene(s) | Orientation | Length | Score | E-val     | %ID                  |
|----------------------------|------------------------|-------------|--------|-------|-----------|----------------------|
| Chromosome:991175-991408   | KS08_04975             | Forward     | 234    | 182   | 1.50E-100 | 94.4 [Alignment]     |
| Chromosome:1332247-1332261 | KS08_06915             | Reverse     | 15     | 15    | 0.68      | 100.0<br>[Alignment] |
| Chromosome:1753259-1753273 | KS08_08735             | Forward     | 15     | 15    | 0.68      | 100.0<br>[Alignment] |
| Chromosome:2711562-2711576 | KS08_13955             | Reverse     | 15     | 15    | 0.68      | 100.0<br>[Alignment] |
| Chromosome:241752-241765   | KS08_01300             | Reverse     | 14     | 14    | 2.7       | 100.0<br>[Alignment] |
| Chromosome:289445-289458   | KS08_01540             | Forward     | 14     | 14    | 2.7       | 100.0<br>[Alignment] |
| Chromosome:1674652-1674665 | KS08_08645             | Reverse     | 14     | 14    | 2.7       | 100.0<br>[Alignment] |
| Chromosome:1871441-1871454 | KS08_09275             | Forward     | 14     | 14    | 2.7       | 100.0<br>[Alignment] |
| Chromosome:2464495-2464508 | KS08_12700             | Forward     | 14     | 14    | 2.7       | 100.0<br>[Alignment] |
| Chromosome:2893211-2893224 | KS08_14950             | Reverse     | 14     | 14    | 2.7       | 100.0<br>[Alignment] |



## **Medium ingredients**

### **potato dextrose agar medium, PDA (1L)**

potato, 200 g

dextrose, 20 g

agar, 13 g

Potatoes peeled and cut into pieces boiled for half an hour, using gauze filter to remove residue, fixed volume to 1L.

### **potato dextrose medium, PDB (1L)**

potato, 200 g

dextrose, 20 g

Potatoes peeled and cut into pieces boiled for half an hour, using gauze filter to remove residue, fixed volume to 1L.

### **potato sucrose agar medium, PSA (1L)**

potato, 200 g

sucrose, 20 g

agar, 13 g

Potatoes peeled and cut into pieces boiled for half an hour, using gauze filter to remove residue, fixed volume to 1L.

### **Czapek–Dox Medium, CDM (1L)**

NaNO<sub>3</sub>, 3g

KH<sub>2</sub>PO<sub>4</sub>, 1g

MgSO<sub>4</sub>·7H<sub>2</sub>O, 0.5g

KCl, 0.5g

FeSO<sub>4</sub>, 0.01g

sucrose, 30g

agar, 15~20g

Add ddH<sub>2</sub>O to 1 L

### **Minimal Medium, MM (1L)**

NaNO<sub>3</sub>, 2g

KH<sub>2</sub>PO<sub>4</sub>, 1g

KCl, 0.5g

MgSO<sub>4</sub>·7H<sub>2</sub>O, 0.5g

FeSO<sub>4</sub>·7H<sub>2</sub>O, 0.5g

sucrose, 30g

**Fusarium Trace elements (100mL)**

Citric acid, 5g

ZnSO<sub>4</sub>·7H<sub>2</sub>O, 5g

Fe(NH<sub>4</sub>)<sub>2</sub>SO<sub>4</sub>·6H<sub>2</sub>O, 1g

CuSO<sub>4</sub>·5H<sub>2</sub>O, 0.25g

Add ddH<sub>2</sub>O to 1L, adjust pH to 6.9, and add 200μL of Fusarium Trace elements mixture per 1L.

**Complete Medium, CM (1L)**

20×Nitrate salts, 50mL

Trace elements, 1mL

Vitamin solution, 1mL

yeast extract, 1g

Casamino acid, 1g

peptone, 2g

D-glucose, 10g

After adding ddH<sub>2</sub>O to 1 L, adjust the pH to 6.5 with 10 mol/L NaOH.

**20×Nitrate salts (50ml)**

KH<sub>2</sub>PO<sub>4</sub>, 1.52g

KCl, 0.52g

MgSO<sub>4</sub>·7H<sub>2</sub>O, 0.52g

NaNO<sub>3</sub>, 6g

**Trace elements (1L)**

Na<sub>4</sub>EDTA, 5g

ZnSO<sub>4</sub>·7H<sub>2</sub>O, 2.2g

H<sub>3</sub>BO<sub>3</sub>, 1.1g

FeSO<sub>4</sub>·7H<sub>2</sub>O, 0.5g

MnCl<sub>2</sub>·4H<sub>2</sub>O, 0.5g

CoCl<sub>2</sub>·6H<sub>2</sub>O, 0.17g

CuSO<sub>4</sub>·5H<sub>2</sub>O, 0.16g

Na<sub>2</sub>MoO<sub>4</sub>·5H<sub>2</sub>O, 0.15g

**Vitamin solution (1L)**

PABA (p-aminobenzoic acid), 0.01g

Nicotinic acid, 0.01g

Thiamine, 0.01g

Biotin, 0.01g

Riboflavin, 0.01g

Pyridoxin, 0.01g

**Cornmeal agar medium, CMA (1 L)**

Cornmeal, 40 g

Agar, 10-15 g

Add ddH<sub>2</sub>O to 1L.

**Yeast extract Peptone Dextrose medium, YEPD (1 L)**

yeast extract, 3 g

peptone, 10 g

dextrose, 20 g

agar, 10-15 g

Add ddH<sub>2</sub>O to 1L.

**Carota agar medium, CAM (1 L)**

carota, 200 g

dextrose, 20 g

agar, 10-15 g

Carota peeled and cut into pieces boiled for half an hour, using gauze filter to remove residue, fixed volume to 1L.

1. Subramaniam, R.; Narayanan, S.; Walkowiak, S.; Wang, L.; Joshi, M.; Rocheleau, H.; Ouellet, T.; Harris, L.J. Leucine metabolism regulates TRI6 expression and affects deoxynivalenol production and virulence in *Fusarium graminearum*. *Mol Microbiol* **2015**, *98*, 760-769, doi:10.1111/mmi.13155.
